# Supplementary material for: Reactive Astrocytes Promote ALS-like Degeneration and Intracellular Protein Aggregation in Human Motor Neurons by Disrupting Autophagy through TGF-β1
Source: PubMed Central journal article supplement — Stem Cell Reports. 2017 Jul 14;9(2):667–80. doi: 10.1016/j.stemcr.2017.06.008 (PMC5549875; doi:10.1016/j.stemcr.2017.06.008), 2017-07-14
Supplement: mmc1.pdf [file mmc1.pdf]

**Stem Cell Reports, Volume 9**

**Supplemental Information**

**Reactive Astrocytes Promote ALS-like Degeneration and Intracellular Protein Aggregation in Human Motor Neurons by Disrupting Autophagy through TGF- $\beta$ 1**

**Pratibha Tripathi, Natalia Rodriguez-Muela, Joseph R. Klim, A. Sophie de Boer, Sahil Agrawal, Jackson Sandoe, Claudia S. Lopes, Karolyn Sassi Ogliari, Luis A. Williams, Matthew Shear, Lee L. Rubin, Kevin Eggan, and Qiao Zhou**

## Supplementary Figures and Legends

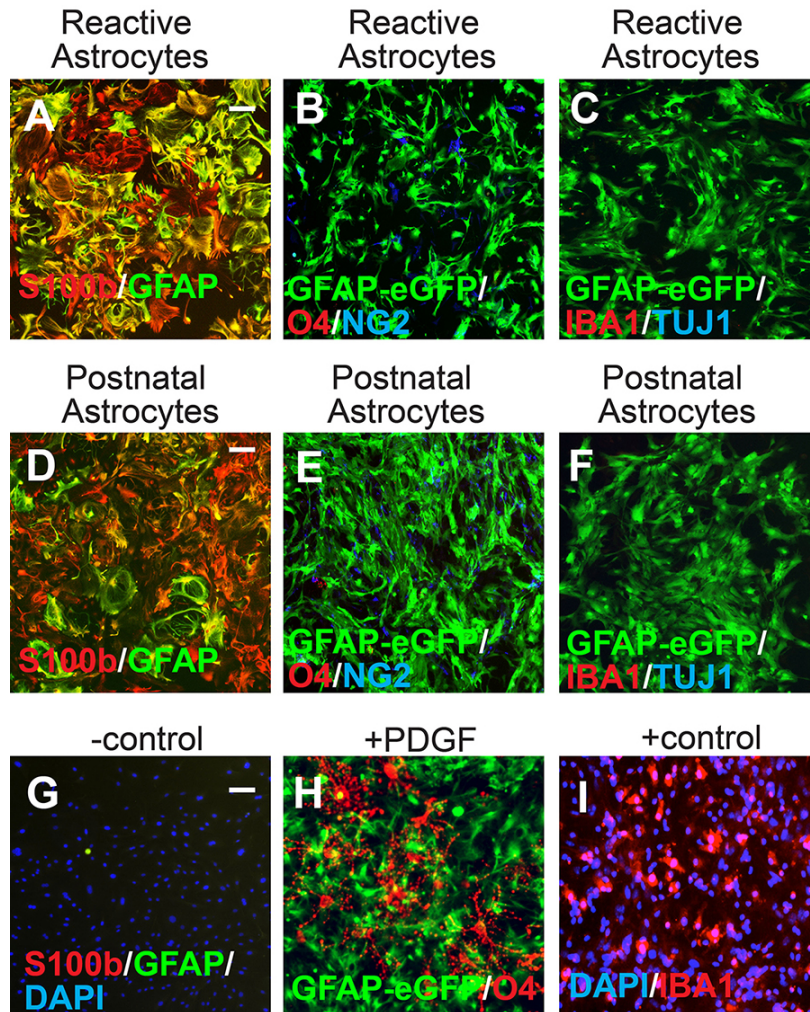

**Figure S1: Immunohistochemical analysis of mutant astrocytes (associated with Figure 1).**

Immunohistochemistry showed that astrocyte cultures obtained from adult and postnatal mouse spinal cord are highly enriched for GFAP<sup>+</sup>S100b<sup>+</sup>astrocytes (**A, D**) and devoid of TUJ1<sup>+</sup> neurons, O4<sup>+</sup> oligodendrocytes, and IBA1<sup>+</sup> microglia (**B, C, E, G**). A small number of NG2<sup>+</sup> cells are present in the cultures (**B, E**). A mixed

culture of embryonic mouse brain served as positive controls for O4 and IBA1 antibody staining (**H, I**).

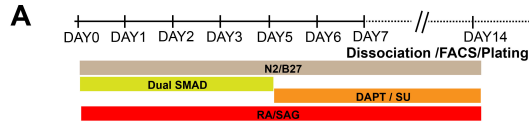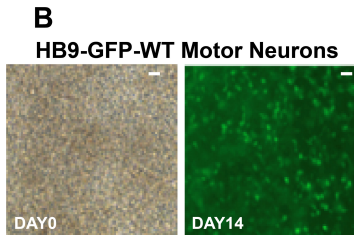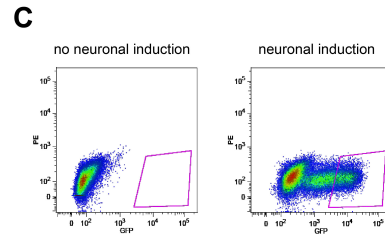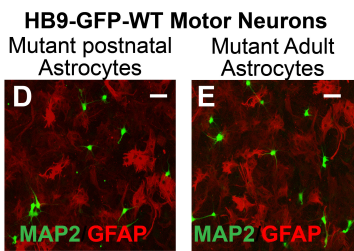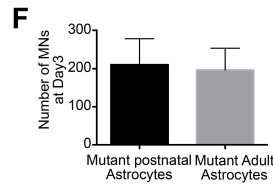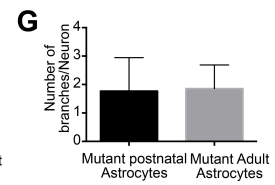

HB9-GFP-WT motor neurons cocultured with mutant adult astrocytes

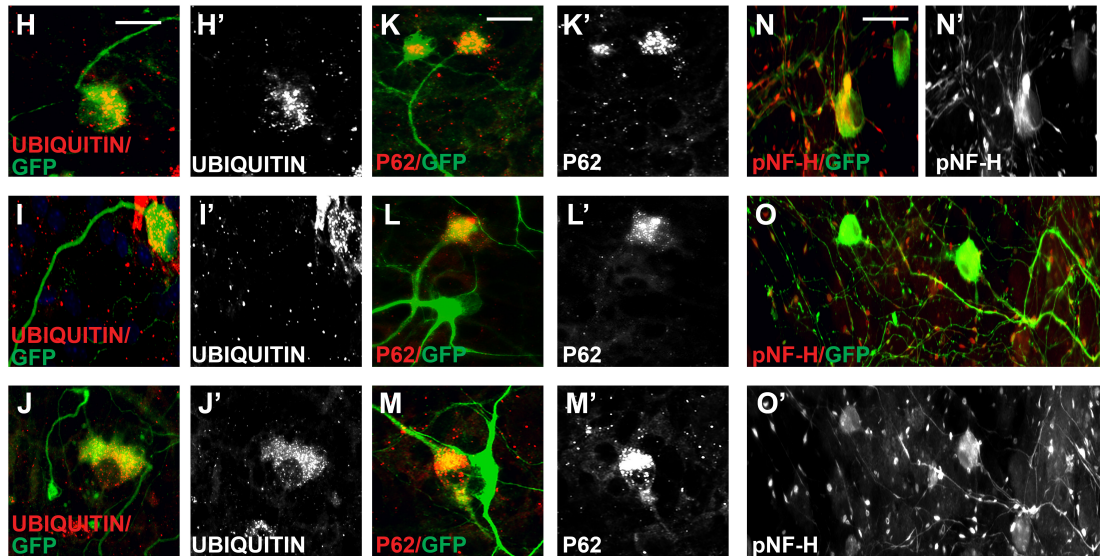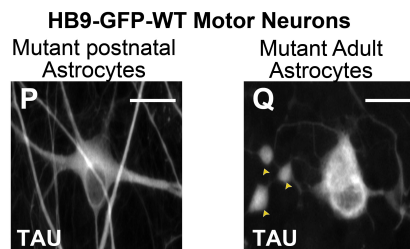

**Figure S2: FACS purified human embryonic stem cells derived wild-type hMNs co-cultured with SOD1 mutant adult astrocytes display protein inclusions and axonal swelling (associated with Figure 1 and Figure 2).**

(A) Diagram of the motor neuron differentiation protocol. For details, see “Methods” section. (B) hES cell colony carrying the HB9-GFP transgene was expanded and differentiated for 14 days showing numerous GFP<sup>+</sup> motor neurons. (C) FACS plots of differentiated cell cultures from an HB9-GFP<sup>-</sup> hES line. Approximately 20% of the cells were GFP<sup>+</sup>.

There was no significant difference in the survival and neurite branching of wild-type hMNs co-cultured with either mutant postnatal astrocytes (D) or mutant adult astrocytes (E) at day 3, suggesting that the initial attachment, survival, and branching of hMNs are comparable in either condition. Quantifications are presented as mean±s.e.m from three separate experiments (F, G).

Additional examples of UBIQUITIN<sup>+</sup>, P62<sup>+</sup>, pNF-H<sup>+</sup> protein inclusion formation in wild-type human motor neurons co-cultured with mutant adult astrocytes for 60 days (H-O’). Abnormal axonal swellings were revealed by TAU staining in wild-type human motor neurons co-cultured with SOD mutant adult astrocytes (Q, arrowheads) in contrast to co-cultures with mutant postnatal astrocytes (P).

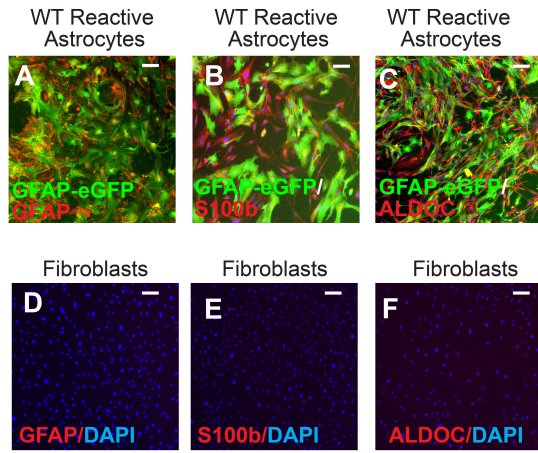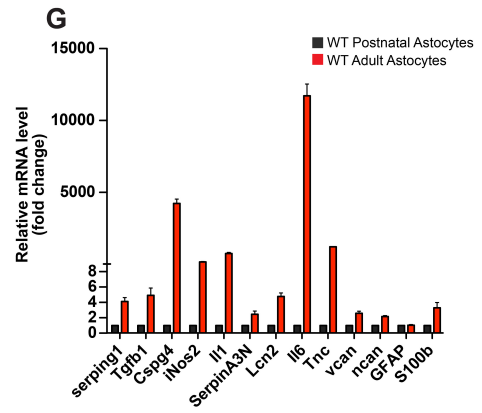

HB9-GFP-WT motor neurons cocultured with wild-type reactive astrocytes

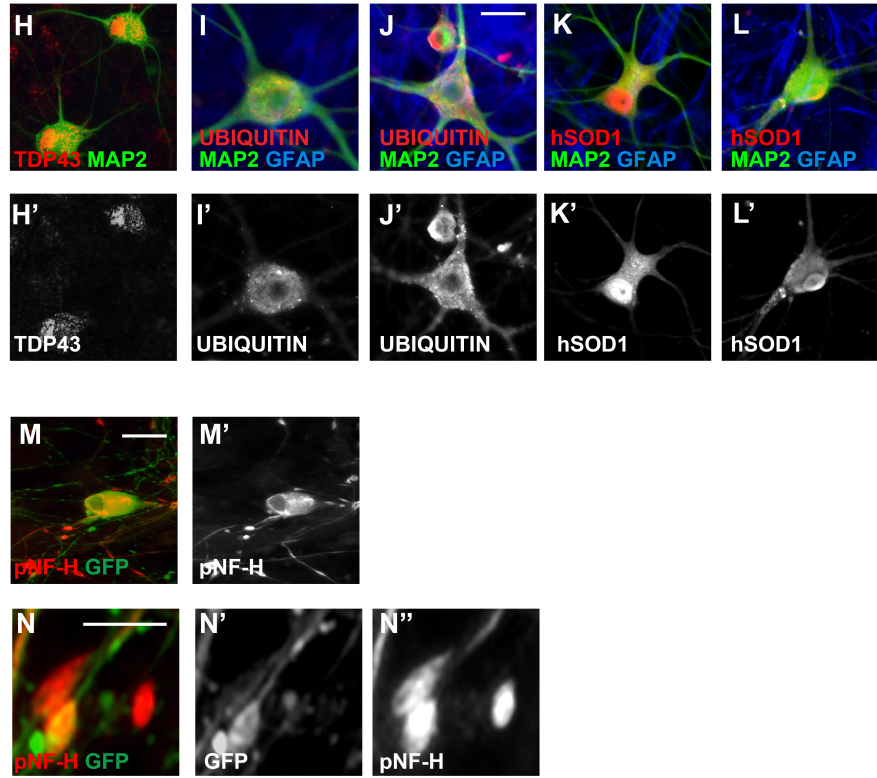

HB9+ hMNs cocultured with WT Non Reactive Astrocytes

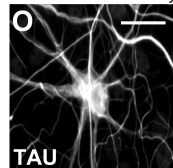

HB9+ hMNs cocultured with WT Reactive Astrocytes

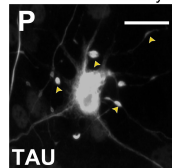

**Figure S3. Wild-type hMNs co-cultured with reactive astrocytes isolated from the cortex of stab injury models of adult mice display protein inclusions and axonal swelling (associated with Figure 3).**

**(A-F)** Immunohistochemistry detected robust expression of GFAP, S100b, and ALDOC of wild-type reactive astrocytes isolated from adult mice **(A-C)**. No expression of these genes was seen in control fibroblasts **(D-F)**. qPCR analysis of cultured wild-type adult reactive astrocyte. Compared with early postnatal astrocytes, the adult reactive astrocytes have significantly elevated expression of multiple “reactive” factors **(G)**.

**(H-N)** Additional examples of TDP43<sup>+</sup>, UBIQUITIN<sup>+</sup>, hSOD1<sup>+</sup>, and p-NF-H inclusions in wild-type human motor neurons co-cultured with reactive astrocytes for 60 days. **(P)** Abnormal axonal swellings observed by TAU staining in wild-type human motor neurons co-cultured with WT reactive astrocytes **(O, arrowheads)** in comparison to non-reactive astrocytes.

# HB9-GFP-WT Motor Neurons

WT Non Reactive Astrocytes      WT Reactive Astrocytes

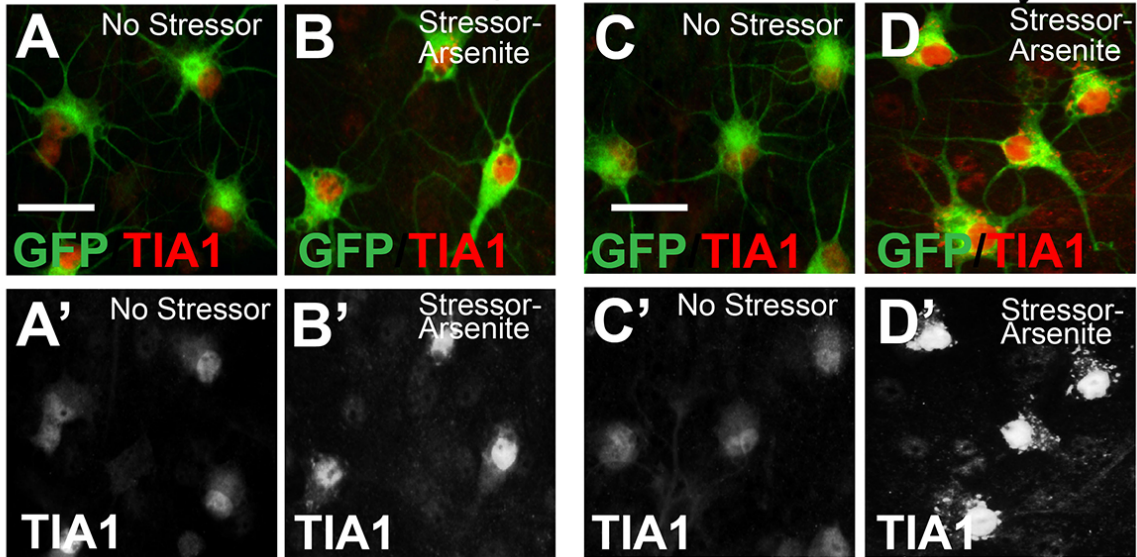

**E** Non-Reactive Astrocytes with HB9-GFP-WT Motor Neurons

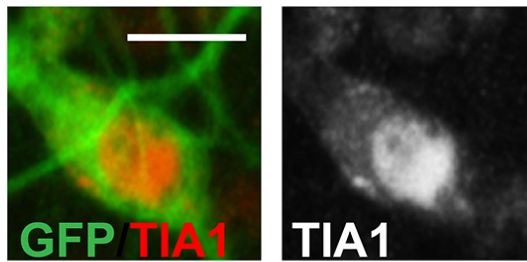

**F** Reactive Astrocytes with HB9-GFP-WT Motor Neurons

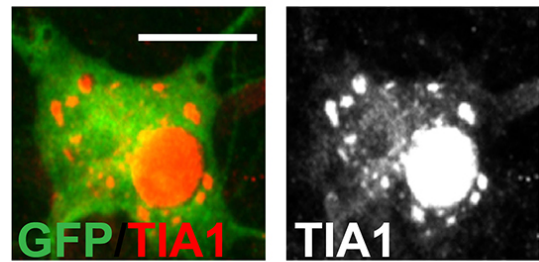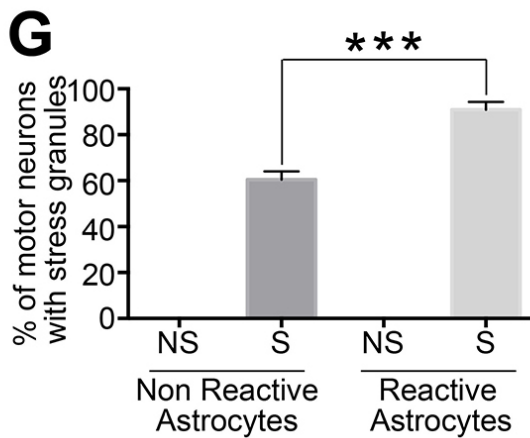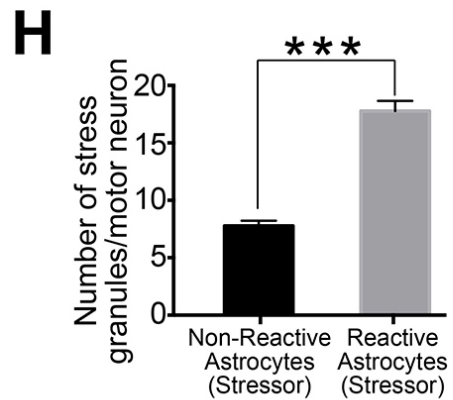



**Figure S4. WT reactive astrocytes enhance stress granule formation in human motor neurons (associated with Figure 3).**

In 3-day co-cultures of hMNs and astrocytes, the acute stress inducer Arsenite was used to induce stress granules (SG). Immunostaining with the SG marker TIA1 showed that in co-cultures with reactive astrocytes, there was a significant increase in the number of hMNs bearing SGs (**C, D, F, G**), as well as increased number of SGs per motor neuron (**C, D, F, H**), compared with controls (**A, B, E, G, H**). These data suggest increased environmental stress on hMNs from the reactive astrocytes. Quantifications are presented as mean±s.e.m. Data collected from at least three independent experiments each with triplicates. Three asterisks ( $P<0.001$ ). Mann-Whitney test.

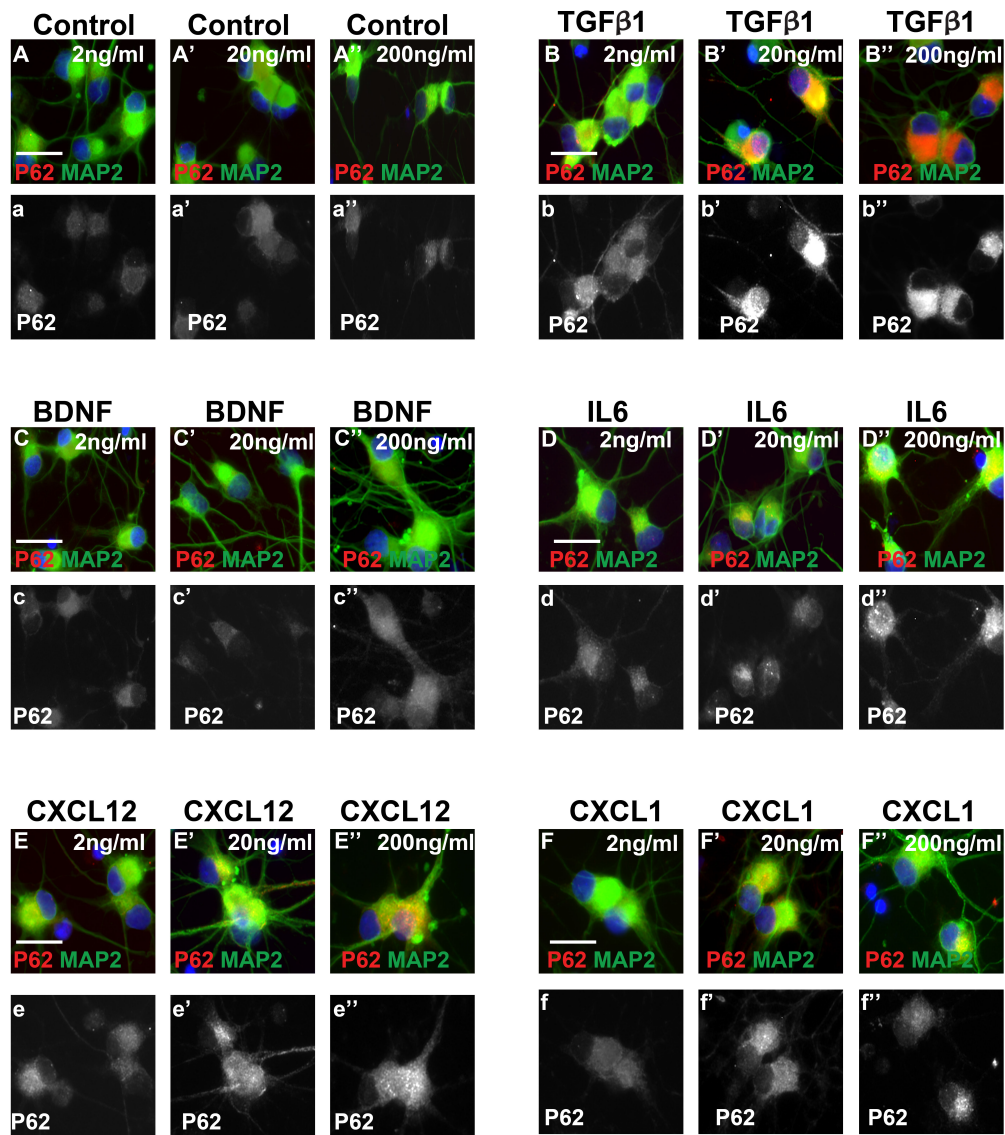

**Figure S5. Dose response of P62 inclusion formation in wild-type human motor neurons treated with various cytokines for 14 days (associated with Figure 4).**

At 2ng/ml, none of the cytokine-treated hMNs showed significant P62 inclusions. At 20ng/ml, TGF $\beta$ 1 induced large numbers of P62 inclusions in hMNs whereas IL6, CXCL1, and CXCL12 induced a small number of P62 aggregates. Inclusion formation did not appear to increase significantly at 200ng/ml for CXCL1 and CXCL12, but more were seen in IL6-treated hMNs (albeit less than that of TGF $\beta$ 1-treated samples).

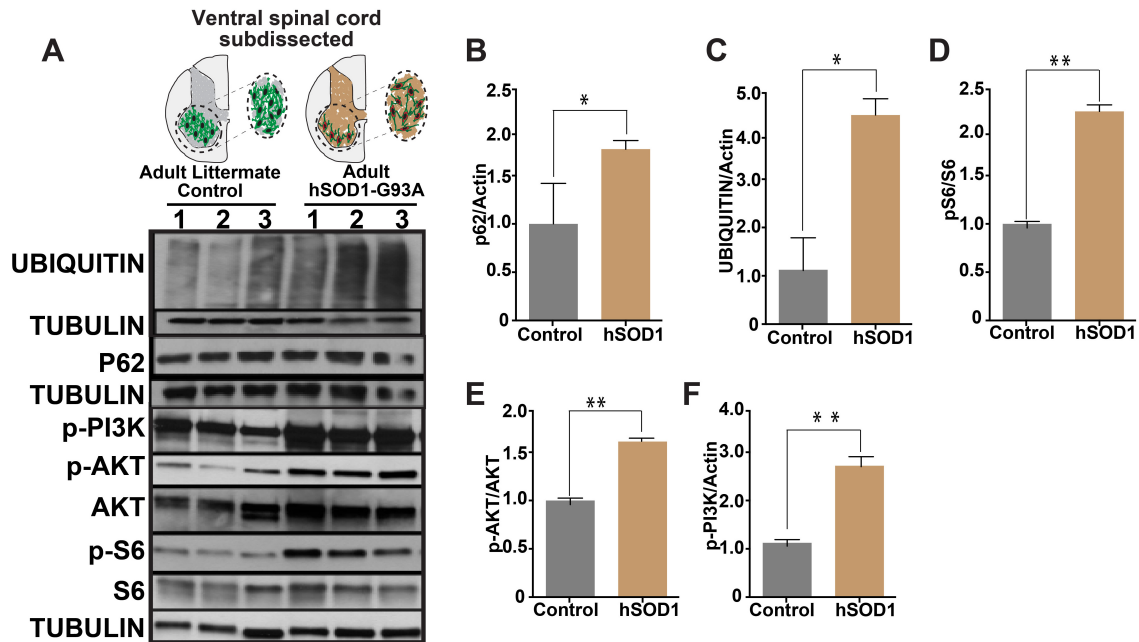

**Figure S6. P62 mRNA levels in wild-type human motor neurons treated with various cytokines for 14 days (associated with Figure 6).**

The ventral spinal cord tissues of wild-type control mice and hSOD1<sup>G93A</sup> mutant mice were micro-dissected and analyzed with Western Blot (**A**). P62 and UBIQUITIN levels were significantly increased in the mutant animals (**A-C**). Significant increase of p-S6, p-AKT, and p-PI3K were detected in late stage hSOD1<sup>G93A</sup> mutant mice, indicating activation of mTOR-PI3K-AKT signaling (**D-F**). Data collected from three independent experiments each with triplicates. One asterisk ( $P < 0.05$ ); two asterisks ( $P < 0.01$ ). Mann-Whitney test.

## Supplemental Tables

**Table S1: RT primer sequences (Related to Figure 1 and Figure S3)**

| <b>Name of the RT primers</b> | <b>Sequence</b>                   |
|-------------------------------|-----------------------------------|
| Gfap iso1_Fw                  | <i>acagactttctccaacctccag</i>     |
| Gfap iso1_Rw                  | <i>ccttctgacacggatttggf</i>       |
| Nf1a-isoA_Fw                  | <i>ccagaacttggtggatgga</i>        |
| Nf1a-isoA_Rw                  | <i>gaaccatgtgtaggccaagg</i>       |
| S100b_Fw                      | <i>aacaacgagctctctcacttcc</i>     |
| S100b_Rw                      | <i>ctccatcactttgtccacca</i>       |
| Aldoc_Fw                      | <i>cgtaggcatacaaggttgaca</i>      |
| Aldoc_Rw                      | <i>gagcacagcgtccaagag</i>         |
| Aldh1l1_Fw                    | <i>tccctacttcccgtcttga</i>        |
| Aldh1l1_Rw                    | <i>acaggctctgcccgattac</i>        |
| Glt1_iso1&3_Fw                | <i>ttctacagctgagagaatggta</i>     |
| Glt1_iso1&3_Rw                | <i>ttcgggtgcttggctcat</i>         |
| Aqp4_Fw                       | <i>tggaggattgggagtcacc</i>        |
| Aqp4_Rw                       | <i>tgaacaccaactggaaagtga</i>      |
| Glast_Fw                      | <i>agaaggtaaaatcgtgcaggtc</i>     |
| Glast_Rw                      | <i>accagattgggaggaacat</i>        |
| Glul_Fw                       | <i>ctcgctctctgacctgttc</i>        |
| Glul_Rw                       | <i>ttcaagtgggaacttgctga</i>       |
| Vim_Fw                        | <i>gcctcagagaggtcagcaaa</i>       |
| Vim_Rw                        | <i>tgcgccagcagtatgaaa</i>         |
| Acan_Fw                       | <i>gagggtgggaagccatgt</i>         |
| Acan_Rw                       | <i>ccagcctacaccccagtg</i>         |
| Vcan_Fw_iso1                  | <i>cagcggcaaagttcagagt</i>        |
| Vcan_Rw_iso1                  | <i>cactggctgtggatggg</i>          |
| Ncan_Fw                       | <i>gcttcgacgcctactgctt</i>        |
| Ncan_Rw                       | <i>tccagatgaggggatctcag</i>       |
| Cspg4_Fw                      | <i>cacctccaggtggttctcc</i>        |
| Cspg4_Rw                      | <i>cttggccttgttggtcagat</i>       |
| Lcn2_Fw                       | <i>tctgatccagtagcgacagc</i>       |
| Lcn2_Rw                       | <i>ccatctatgagctacaagagaacaat</i> |
| Serpina3n_Fw                  | <i>acatcgggagtcagctatcac</i>      |
| Serpina3n_Rw                  | <i>ccatcttctgttctgcagtc</i>       |
| IL6_Fw                        | <i>ccaggtagctatggactccagaa</i>    |
| IL6_Rw                        | <i>gctaccaaactggatataatcagga</i>  |
| Tgfb1_Fw                      | <i>gtcagcagccggtacca</i>          |
| Tgfb1_Rw                      | <i>tggagcaacatgtggaactc</i>       |
| IL-1 $\beta$ _Fw              | <i>agctggatgctctcatcagg</i>       |

|                  |                                 |
|------------------|---------------------------------|
| IL-1 $\beta$ _Rw | <i>agttgacggacccccaaaag</i>     |
| iNOS2_Fw         | <i>tcattgtactctgagggctgac</i>   |
| iNOS2_Rw         | <i>ctttgccacggacgagac</i>       |
| Cxcl1_Rw         | <i>gactccagccacactccaac</i>     |
| Cxcl1_Fw         | <i>tgacagcgcagctcattg</i>       |
| Ptges_Rw         | <i>gcacactgctggatcaag</i>       |
| Ptges_Fw         | <i>acgtttcagcgcacccctc</i>      |
| Serping1_Fw      | <i>ccaaaggtgtcacttctgtgtc</i>   |
| Serping1_Rw      | <i>gagatgcattcacataggtgtcc</i>  |
| Cxcl12_Rw        | <i>ctgtgcccttcagattgttg</i>     |
| Cxcl12_Fw        | <i>ctctgcgccccttgttta</i>       |
| Cxcl16_Rw        | <i>tcagccctgacagtcctaaaa</i>    |
| Cxcl16_Fw        | <i>ccccaaagagcagtcctttaat</i>   |
| Spp1_iso1_Rw     | <i>caaggtaagcctgcagtg</i>       |
| Spp1_iso1_Fw     | <i>catggtcgtagttagccctca</i>    |
| Stat6_Rw         | <i>ctgccaacccttgtagcc</i>       |
| Stat6_Fw         | <i>ttggctgaggtccctagaaa</i>     |
| Hspb1_Rw         | <i>aggagctcacagtgaaacca</i>     |
| Hspb1_Fw         | <i>ctttcttcgtgcttgccagt</i>     |
| Slc7a11_Rw       | <i>ttgaacatttcttagtaagcatgg</i> |
| Slc7a11_Fw       | <i>tggacactcatgacctcaaa</i>     |
| Tnc_Fw           | <i>cagttggatgtccccaatct</i>     |
| Tnc_Rw           | <i>gcacccagagactttgcttt</i>     |
